# Supplementary material
Source: Royal Society of Chemistry journal article supplement (doi:10.1039/d5cp00848d)
Supplement: d5cp00848d1.pdf [file d5cp00848d1.pdf]

# Supplementary Information: Revealing Formic Acid Adsorption Geometries on Magnetite (001) and (111) Surfaces by IRRAS Line Shape Analysis

Heshmat Noei<sup>1\*</sup>, Marcus Creutzburg<sup>1</sup>, Gregor Vonbun-Feldbauer<sup>2,3,4</sup>, and  
Andreas Stierle<sup>1,5</sup>

<sup>1</sup>*Deutsches Elektronen-Synchrotron DESY, Center of X-ray and Nano Science (CXNS),  
Notkestr. 85, 22607 Hamburg, Germany*

<sup>2</sup>*Hamburg University of Technology (TUHH), Institute for Interface Physics and Engineering, Am  
Irrgarten 3-9, 21073 Hamburg, Germany*

<sup>3</sup>*Hamburg University of Technology (TUHH), Institute of Advanced Ceramics, Denickestr. 15,  
21073 Hamburg, Germany*

<sup>4</sup>*Helmholtz-Zentrum Hereon, Institute of Surface Science, Max-Planck-Str. 1, 21502 Geesthacht,  
Germany*

<sup>5</sup>*University of Hamburg, Department of Physics, Luruper Chaussee 149, 22607 Hamburg, Germany*

April 20, 2026

## Contents

|                                          |           |
|------------------------------------------|-----------|
| <b>S1 Calculated Vibrational Spectra</b> | <b>2</b>  |
| <b>S2 Fano fitting</b>                   | <b>15</b> |

## S1 Calculated Vibrational Spectra

The accuracy of the calculated vibrational wavenumbers for specific modes depends strongly on the chosen approximations. One approximation is the chosen level of theory for the electronic structure calculation or more general for the atomistic simulation method. Here, density functional theory (DFT) calculations were done with the generalized gradient approximation (GGA) for the exchange-correlation (XC) functional. Specifically, PBE [1] was used as XC functional. PBE often underestimates bonds strengths and force constants [2, 3] which causes underestimated (red-shifted) vibrational frequencies and wavenumbers. Increasing the level of theory within the framework of DFT can help here; however, there is no guarantee. E.g., metaGGAs like SCAN [4] failed to significantly improve over GGA results for CO adsorbed on ceria surfaces [5], while it was shown that the hybrid functional HSE06 [6] works very well for that specific application [7]. Going beyond the level of DFT can yield more accurate vibrational frequencies at significantly increased computational costs, e.g., Alecu *et al.* [8] showed that calculations based on coupled cluster theory reproduced experimental results for the F38/10 database including 15 small molecules more reliably than DFT. Current advances from the field of machine learning are very promising but those are not discussed here.

On the other hand, the chosen approximation for the vibrations is important. Here, the harmonic approximation was used which neglects anharmonicity and therefore usually overestimates vibrational frequencies and wavenumbers. This corresponds to a blue shift versus experimental results. Since the two approximations often show different signs, a partial compensation can take place. The resulting effect however depends on the vibrational mode and the involved bonds as exemplified in the following by literature results all obtained using DFT.

Porezag and Pederson presented calculated and experimental vibrational frequencies for a set of small molecules, namely 4 small hydrocarbons and water, for LDA and GGA functionals [9]. Based on that data, Skibinski *et al.* [10] calculated an average red shift of 2.8 % for GGA functionals. Investigating phenylphosphinates and benzoates adsorbed on rutile TiO<sub>2</sub> (110) Skibinski *et al.* observed that calculated (using PBE) O-C-O stretching modes of the benzoates were only red-shifted by about 1 % versus their experimental results, while the O-P-O stretching modes appeared red-shifted by about 3–5 %. Similarly, Li *et al.* [11] observed a red shift of the calculated (PBE) frequency of the stretching mode of a free CO molecule and of CO adsorbed on a Fe<sub>3</sub>O<sub>4</sub> (111) surface of about 1 % and 1.5 %, respectively, versus experimental results. In Würger *et al.*, acetone adsorbed on TiO<sub>2</sub> (110) was studied experimentally and computationally using DFT with three different GGA-level XC functionals (PBE, PBEsol [12], PW91 [13]) and one van-der-Waals-corrected functional (optB88-vdW [14, 15]). For the C-C and C-O stretching modes, the calculated frequencies were red-shifted by about 1–1.8 % and 1.8–2.4 %, respectively, versus the experimental results depending on the XC functional. While results for the three standard GGA functionals deviated by less than 0.3 % from each other, the deviation from the vdW-functional was increased to about 0.5–1 %. There is however no clear superiority, since the GGA functional performed better for the C-C mode while the vdW-functional predicted values closer to the experimental results for the C-O mode. Modes including hydrogen showed larger deviations as expected because of the harmonic approximation. For formic acid dissociatively adsorbed on Fe<sub>3</sub>O<sub>4</sub> (001) [16] and (111) [17], a red shift of the calculated (PBE) O-C-O stretching modes versus experimental results by about 1–3.5 % was observed for different binding modes. Symmetric stretching modes were found to be deviating more strongly from the experimental values

than asymmetric stretching modes. In summary, all those results from the literature suggest that calculated vibrational frequencies of modes containing C-O bonds are red shifted versus experimental results by about 1–3.5 % using DFT and GGA XC-functionals.

Additional approximations like neglecting nuclear quantum effects [18] are not be discussed here in more detail, even though they can be important for some vibrations particularly those including light elements as hydrogen as mentioned in the main manuscript.

Calculated vibrational spectra and the corresponding wavenumbers and relative intensities are presented for molecularly and dissociatively adsorbed formic acid on magnetite (001) and (111) surfaces. Computational details can be found in the main manuscript. Only adsorption geometries that were not studied before in our previous publications are shown here. For details on the other geometries and vibrational spectra please refer to [16, 17] and the PhD thesis by Kai Sellschopp [19]. The atomic coordinates (VASP POSCAR format) used as input for the calculations and snapshots (xyz files) of the vibrational motions can be found in the online repository TORE [20].

The following adsorption geometries are shown here:

- $\text{Fe}_3\text{O}_4$  DBT-(001) - molecular adsorption - monodentate mode: Fig. S1, Fig. S2, Tab. S1
- $\text{Fe}_3\text{O}_4$  DBT-(001) - molecular adsorption - quasi-bidentate mode (via rest group H): Fig. S3, Fig. S4, Tab. S2
- $\text{Fe}_3\text{O}_4$  DBT-(001) - dissociative adsorption - monodentate mode: Fig. S5, Fig. S6, Tab. S3
- $\text{Fe}_3\text{O}_4$  tet1-(111) - molecular adsorption - monodentate mode: Fig. S7, Fig. S8, Tab. S4
- $\text{Fe}_3\text{O}_4$  tet1-(111) - molecular adsorption - quasi-bidentate mode (via rest group H): Fig. S11, Fig. S12, Tab. S6
- $\text{Fe}_3\text{O}_4$  tet1-(111) - dissociative adsorption - monodentate mode: Fig. S9, Fig. S10, Tab. S5
- $\text{Fe}_3\text{O}_4$  tet1-(111) - dissociative adsorption - quasi-bidentate mode (via rest group H): Fig. S13, Fig. S14, Tab. S7

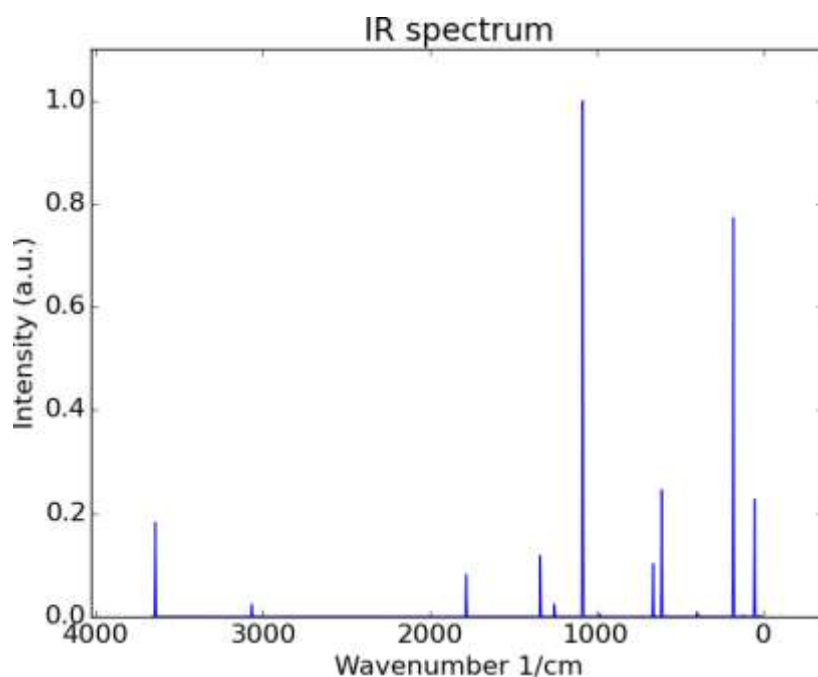

**Figure S1** Complete calculated vibrational spectrum of molecularly adsorbed formic acid at Fe<sub>3</sub>O<sub>4</sub> DBT-(001) surface with a monodentate binding mode. A zoom into the here most relevant wavenumber region is shown in Fig. S2. Wavenumbers and relative intensities are presented in Tab. S1.

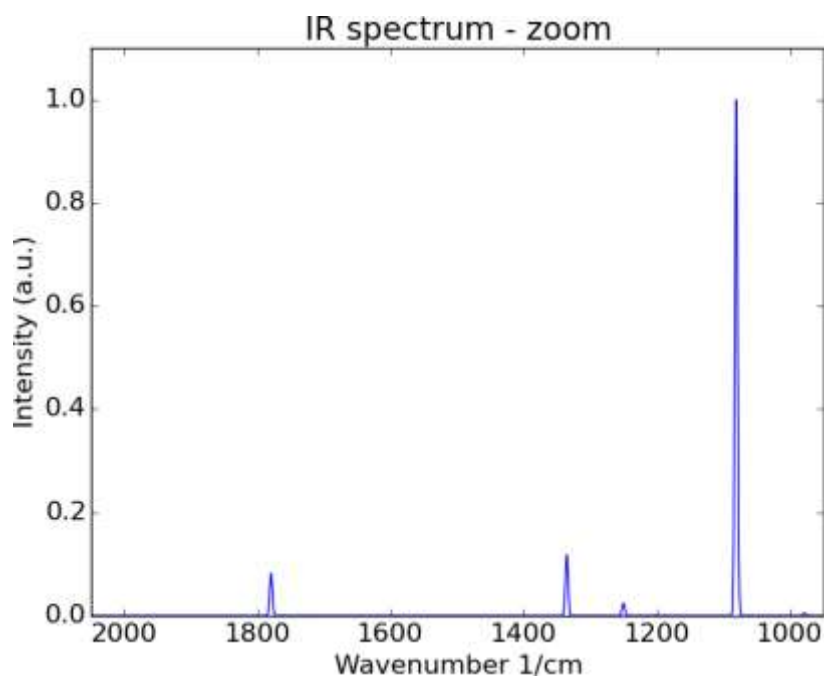

**Figure S2** Zoom into calculated vibrational spectrum of molecularly adsorbed formic acid at Fe<sub>3</sub>O<sub>4</sub> DBT-(001) surface with a monodentate binding mode.

| Mode | Wavenumber (cm <sup>-1</sup> ) | Relative Intensity |
|------|--------------------------------|--------------------|
| 001  | 3644.4                         | 0.183              |
| 002  | 3065.2                         | 0.024              |
| 003  | 1779.5                         | 0.082              |
| 004  | 1335.6                         | 0.118              |
| 005  | 1250.5                         | 0.024              |
| 006  | 1081.2                         | 1.000              |
| 007  | 978.8                          | 0.005              |
| 008  | 658.6                          | 0.103              |
| 009  | 607.2                          | 0.246              |
| 010  | 393.7                          | 0.009              |
| 011  | 192.7                          | 0.001              |
| 012  | 177.4                          | 0.774              |
| 013  | 120.9                          | 0.003              |
| 014  | 50.0                           | 0.228              |
| 015  | 23.1                           | 0.002              |

**Table S1** Calculated vibrational modes of molecularly adsorbed formic acid at Fe<sub>3</sub>O<sub>4</sub> DBT-(001) surface with a monodentate binding mode with their wavenumber in cm<sup>-1</sup> and the relative intensity scaled to the highest peak in this spectrum. Plotted in Fig. S1.

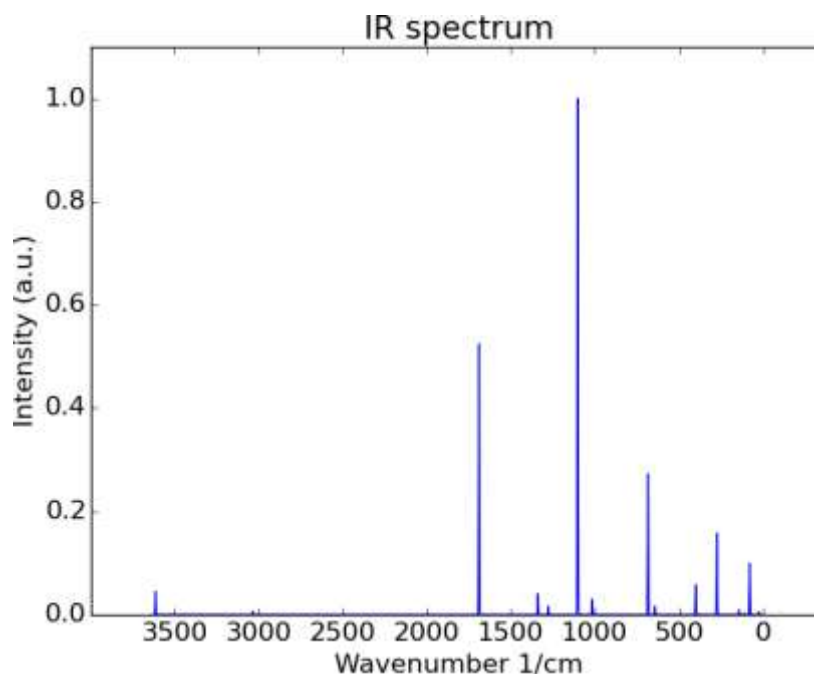

**Figure S3** Complete calculated vibrational spectrum of molecularly adsorbed formic acid at Fe<sub>3</sub>O<sub>4</sub> DBT-(001) surface with a quasi-bidentate binding mode via the rest group hydrogen. A zoom into the here most relevant wavenumber region is shown in Fig. S4. Wavenumbers and relative intensities are presented in Tab. S2.

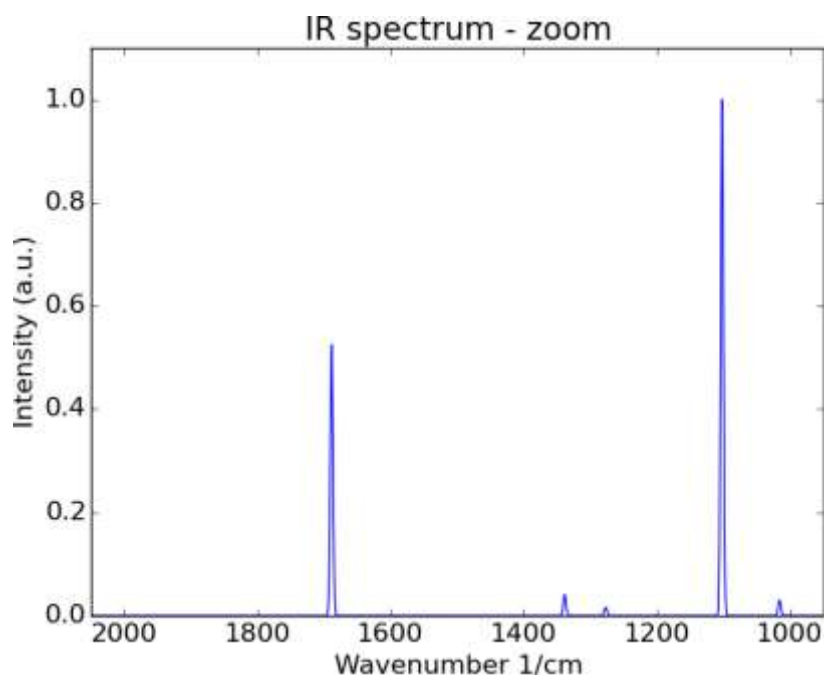

**Figure S4** Zoom into calculated vibrational spectrum of molecularly adsorbed formic acid at Fe<sub>3</sub>O<sub>4</sub> DBT-(001) surface with a quasi-bidentate binding mode via the rest group hydrogen.

| Mode | Wavenumber (cm <sup>-1</sup> ) | Relative Intensity |
|------|--------------------------------|--------------------|
| 001  | 3611.4                         | 0.045              |
| 002  | 3032.2                         | 0.006              |
| 003  | 1688.6                         | 0.525              |
| 004  | 1338.7                         | 0.041              |
| 005  | 1277.0                         | 0.016              |
| 006  | 1102.4                         | 1.000              |
| 007  | 1016.2                         | 0.030              |
| 008  | 684.4                          | 0.273              |
| 009  | 643.2                          | 0.016              |
| 010  | 401.0                          | 0.058              |
| 011  | 275.1                          | 0.158              |
| 012  | 142.8                          | 0.009              |
| 013  | 107.7                          | 0.003              |
| 014  | 79.8                           | 0.099              |
| 015  | 25.0                           | 0.005              |

**Table S2** Calculated vibrational modes of molecularly adsorbed formic acid at Fe<sub>3</sub>O<sub>4</sub> DBT-(001) surface with a quasi-bidentate binding mode via the rest group hydrogen with their wavenumber in cm<sup>-1</sup> and the relative intensity scaled to the highest peak in this spectrum. Plotted in Fig. S3.

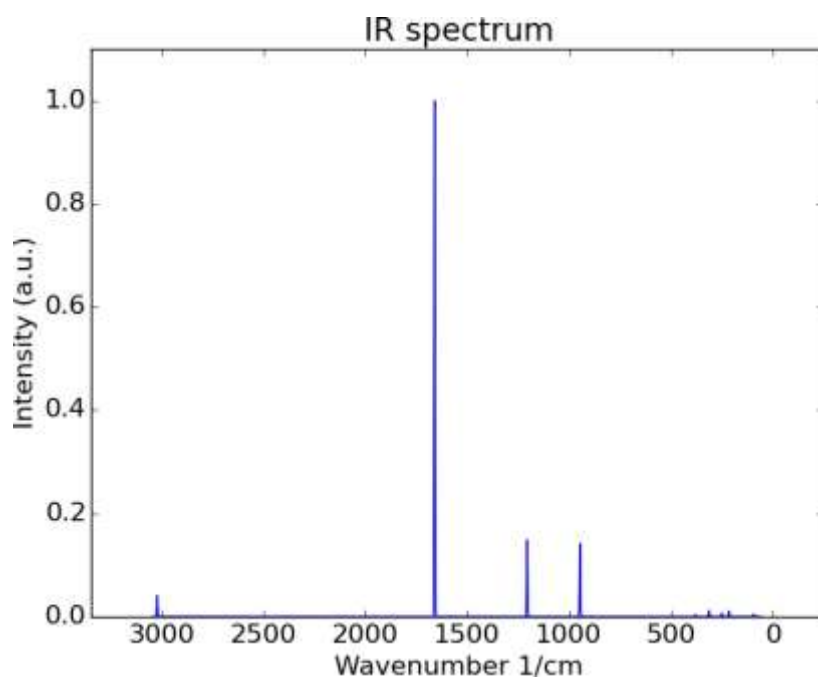

**Figure S5** Complete calculated vibrational spectrum of adsorbed formate at  $\text{Fe}_3\text{O}_4$  DBT-(001) surface with a monodentate binding mode. A zoom into the here most relevant wavenumber region is shown in Fig. S6. Wavenumbers and relative intensities are presented in Tab. S3.

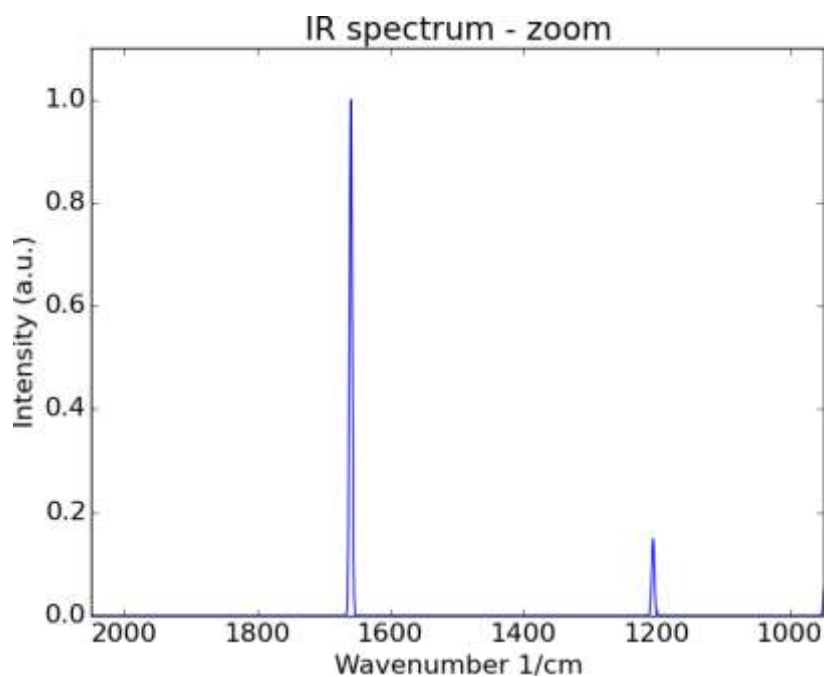

**Figure S6** Zoom into calculated vibrational spectrum of adsorbed formate at  $\text{Fe}_3\text{O}_4$  DBT-(001) surface with a monodentate binding mode.

| Mode | Wavenumber (cm <sup>-1</sup> ) | Relative Intensity |
|------|--------------------------------|--------------------|
| 001  | 3020.1                         | 0.041              |
| 002  | 1659.8                         | 1.000              |
| 003  | 1206.1                         | 0.149              |
| 004  | 946.9                          | 0.142              |
| 005  | 916.0                          | 0.000              |
| 006  | 380.4                          | 0.004              |
| 007  | 313.2                          | 0.012              |
| 008  | 251.1                          | 0.007              |
| 009  | 216.1                          | 0.011              |
| 010  | 198.5                          | 0.000              |
| 011  | 95.4                           | 0.005              |
| 012  | 77.0                           | 0.001              |

**Table S3** Calculated vibrational modes of adsorbed formate at Fe<sub>3</sub>O<sub>4</sub> DBT-(001) surface with a monodentate binding mode with their wavenumber in cm<sup>-1</sup> and the relative intensity scaled to the highest peak in this spectrum. Plotted in Fig. S5.

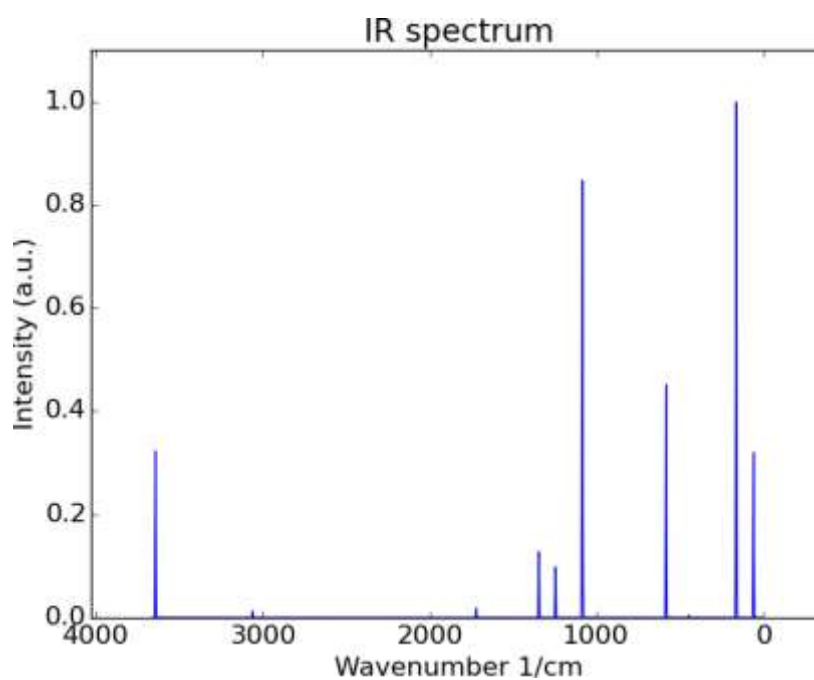

**Figure S7** Complete calculated vibrational spectrum of molecularly adsorbed formic acid at Fe<sub>3</sub>O<sub>4</sub> tet1-(111) surface with a monodentate binding mode. A zoom into the here most relevant wavenumber region is shown in Fig. S8. Wavenumbers and relative intensities are presented in Tab. S4.

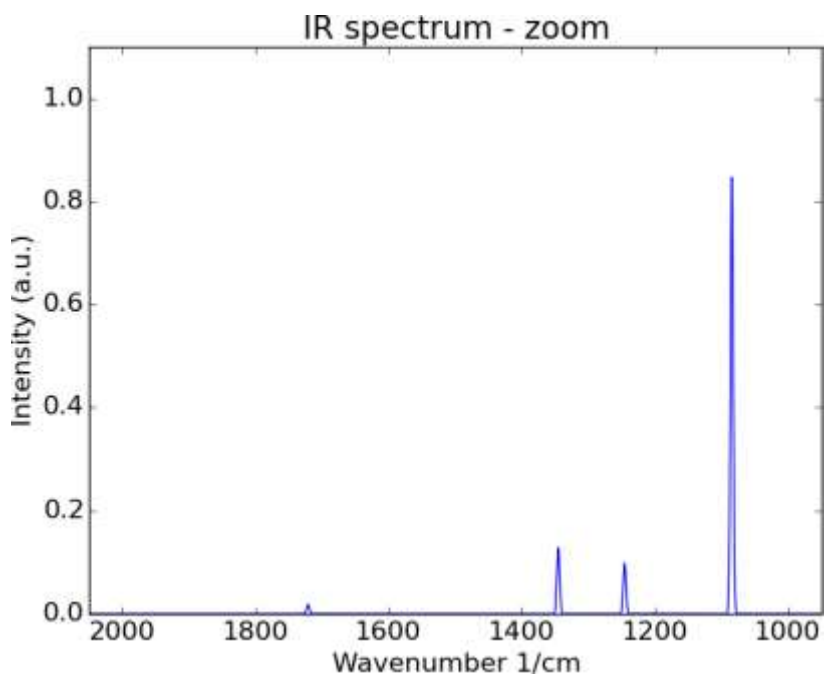

**Figure S8** Zoom into calculated vibrational spectrum of molecularly adsorbed formic acid at Fe<sub>3</sub>O<sub>4</sub> tet1-(111) surface with a monodentate binding mode.

| Mode | Wavenumber (cm <sup>-1</sup> ) | Relative Intensity |
|------|--------------------------------|--------------------|
| 001  | 3641.5                         | 0.323              |
| 002  | 3060.2                         | 0.013              |
| 003  | 1721.0                         | 0.018              |
| 004  | 1345.3                         | 0.128              |
| 005  | 1245.7                         | 0.098              |
| 006  | 1084.8                         | 0.848              |
| 007  | 889.6                          | 0.000              |
| 008  | 620.2                          | 0.000              |
| 009  | 583.6                          | 0.452              |
| 010  | 449.7                          | 0.005              |
| 011  | 200.0                          | 0.000              |
| 012  | 163.6                          | 1.000              |
| 013  | 95.7                           | 0.000              |
| 014  | 59.7                           | 0.320              |
| 015  | 26.9                           | 0.000              |

**Table S4** Calculated vibrational modes of molecularly adsorbed formic acid at Fe<sub>3</sub>O<sub>4</sub> tet1-(111) surface with a monodentate binding mode with their wavenumber in cm<sup>-1</sup> and the relative intensity scaled to the highest peak in this spectrum. Plotted in Fig. S7.

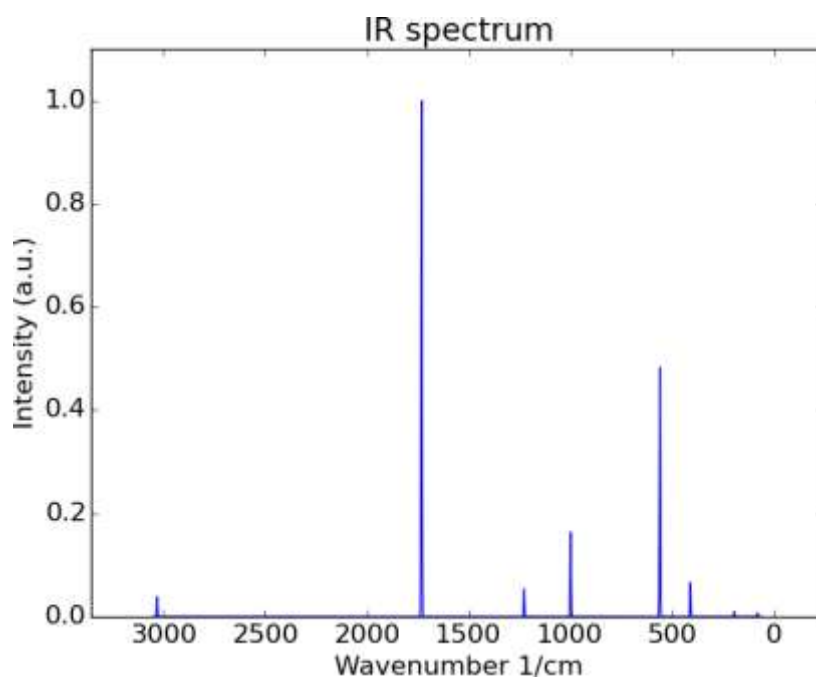

**Figure S9** Complete calculated vibrational spectrum of adsorbed formate at  $\text{Fe}_3\text{O}_4$  tet1-(111) surface with a monodentate binding mode. A zoom into the here most relevant wavenumber region is shown in Fig. S10. Wavenumbers and relative intensities are presented in Tab. S5.

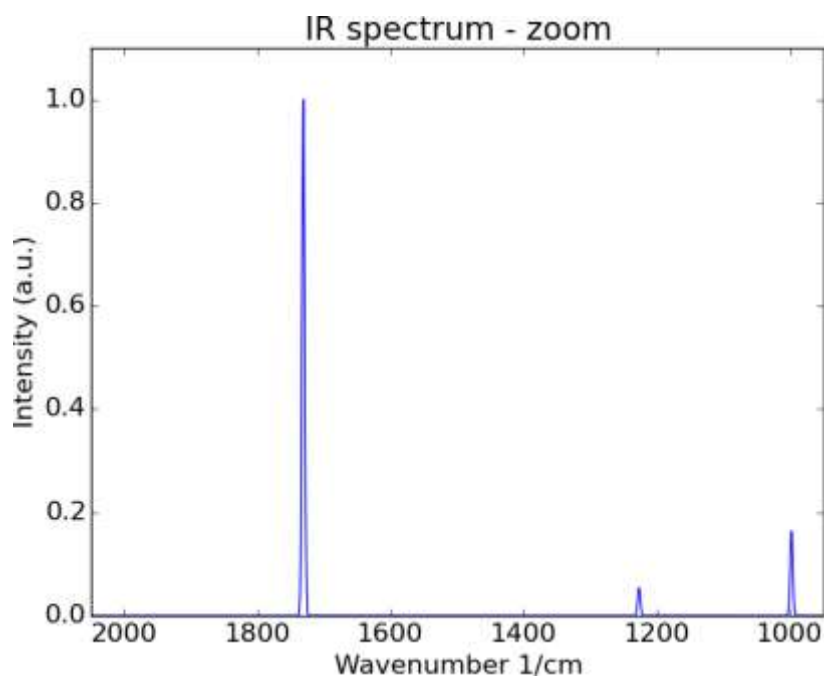

**Figure S10** Zoom into calculated vibrational spectrum of adsorbed formate at  $\text{Fe}_3\text{O}_4$  tet1-(111) surface with a monodentate binding mode.

| Mode | Wavenumber (cm <sup>-1</sup> ) | Relative Intensity |
|------|--------------------------------|--------------------|
| 001  | 3031.7                         | 0.038              |
| 002  | 1731.1                         | 1.000              |
| 003  | 1227.1                         | 0.054              |
| 004  | 998.2                          | 0.164              |
| 005  | 919.6                          | 0.000              |
| 006  | 558.9                          | 0.483              |
| 007  | 409.5                          | 0.066              |
| 008  | 276.5                          | 0.000              |
| 009  | 215.6                          | 0.000              |
| 010  | 193.2                          | 0.010              |
| 011  | 82.2                           | 0.000              |
| 012  | 80.1                           | 0.007              |

**Table S5** Calculated vibrational modes of adsorbed formate at Fe<sub>3</sub>O<sub>4</sub> tet1-(111) surface with a monodentate binding mode with their wavenumber in cm<sup>-1</sup> and the relative intensity scaled to the highest peak in this spectrum. Plotted in Fig. S9.

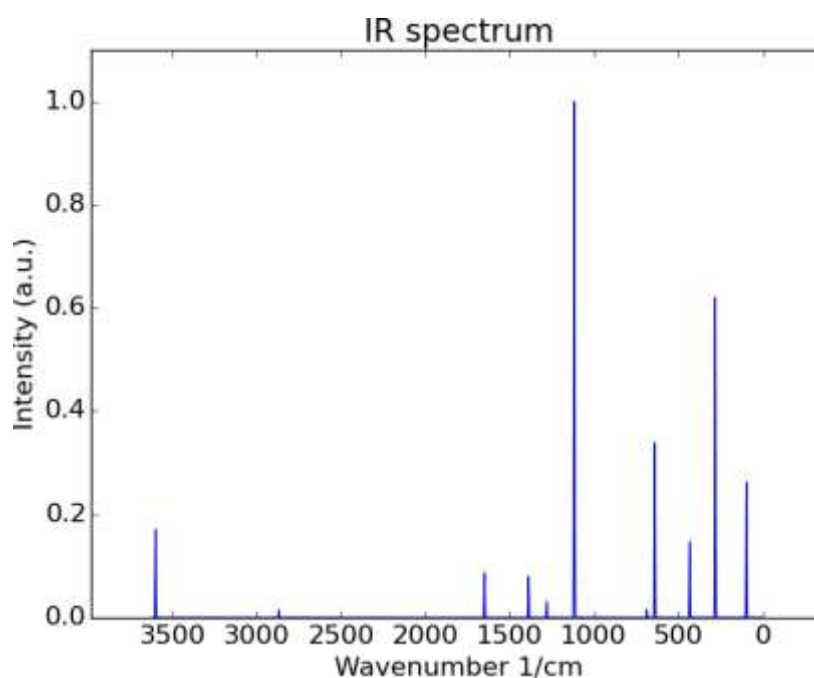

**Figure S11** Complete calculated vibrational spectrum of molecularly adsorbed formic acid at Fe<sub>3</sub>O<sub>4</sub> tet1-(111) surface with a quasi-bidentate binding mode via the rest group hydrogen. A zoom into the here most relevant wavenumber region is shown in Fig. S12. Wavenumbers and relative intensities are presented in Tab. S6.

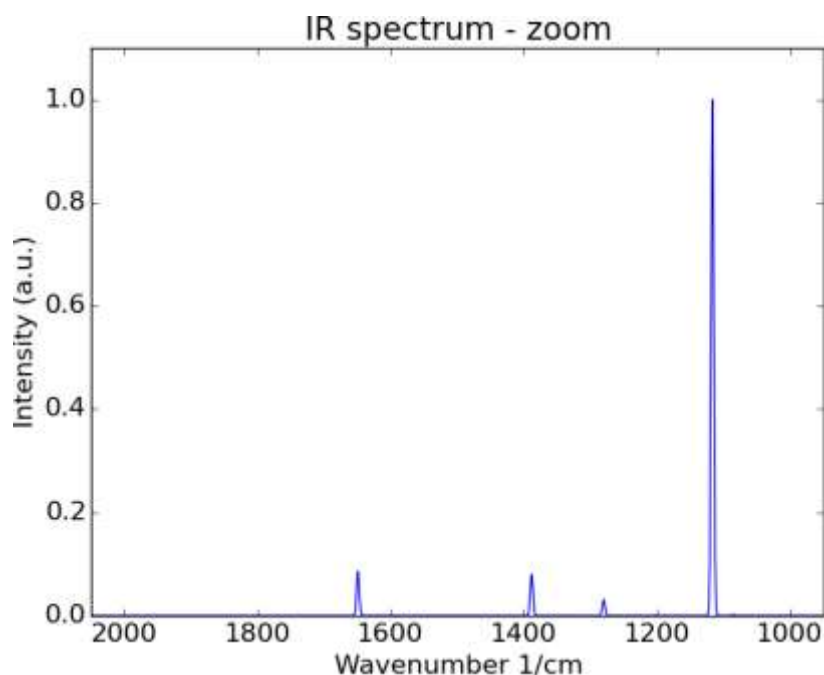

**Figure S12** Zoom into calculated vibrational spectrum of molecularly adsorbed formic acid at Fe<sub>3</sub>O<sub>4</sub> tet1-(111) surface with a quasi-bidentate binding mode via the rest group hydrogen.

| Mode | Wavenumber (cm <sup>-1</sup> ) | Relative Intensity |
|------|--------------------------------|--------------------|
| 001  | 3597.3                         | 0.171              |
| 002  | 2866.8                         | 0.014              |
| 003  | 1649.1                         | 0.086              |
| 004  | 1388.3                         | 0.080              |
| 005  | 1280.1                         | 0.031              |
| 006  | 1116.8                         | 1.000              |
| 007  | 1086.0                         | 0.002              |
| 008  | 687.5                          | 0.016              |
| 009  | 640.4                          | 0.339              |
| 010  | 433.3                          | 0.147              |
| 011  | 282.0                          | 0.621              |
| 012  | 157.5                          | 0.000              |
| 013  | 109.9                          | 0.002              |
| 014  | 97.0                           | 0.262              |
| 015  | 22.4                           | 0.001              |

**Table S6** Calculated vibrational modes of molecularly adsorbed formic acid at Fe<sub>3</sub>O<sub>4</sub> tet1-(111) surface with a quasi-bidentate binding mode via the rest group hydrogen with their wavenumber in cm<sup>-1</sup> and the relative intensity scaled to the highest peak in this spectrum. Plotted in Fig. S11.

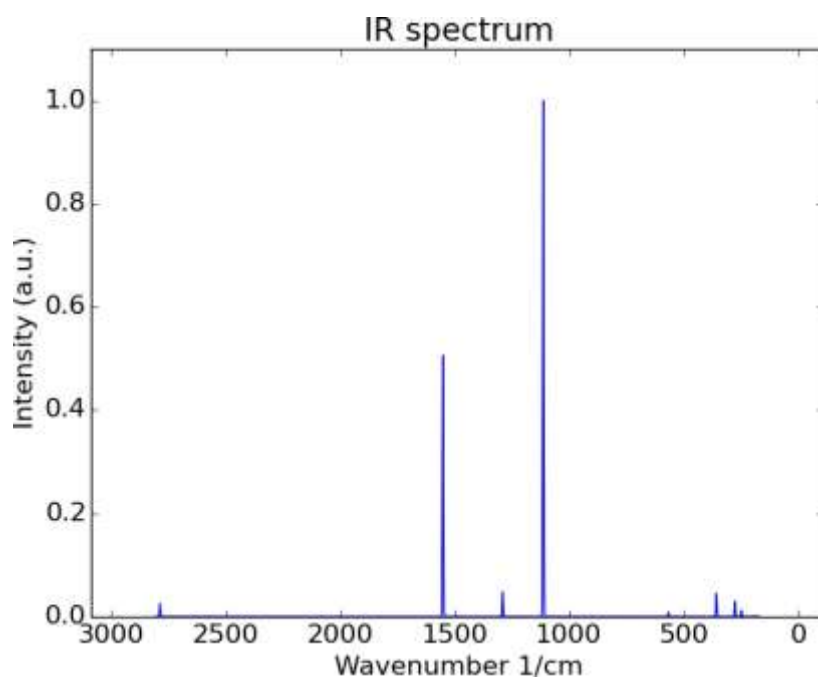

**Figure S13** Complete calculated vibrational spectrum of adsorbed formate at  $\text{Fe}_3\text{O}_4$  tet1-(111) surface with a quasi-bidentate binding mode via the rest group hydrogen. A zoom into the here most relevant wavenumber region is shown in Fig. S14. Wavenumbers and relative intensities are presented in Tab. S7.

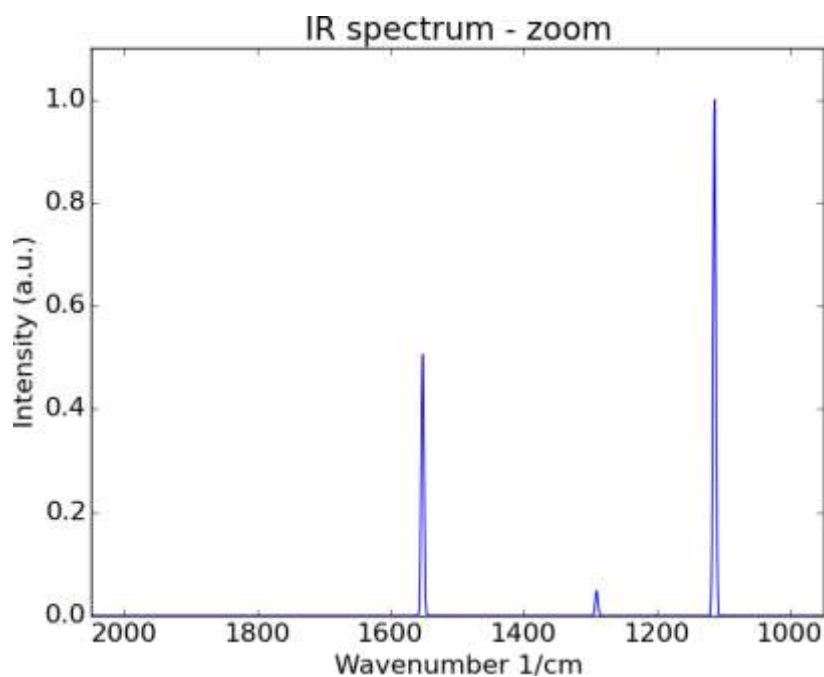

**Figure S14** Zoom into calculated vibrational spectrum of adsorbed formate at  $\text{Fe}_3\text{O}_4$  tet1-(111) surface with a quasi-bidentate binding mode via the rest group hydrogen.

| Mode | Wavenumber (cm <sup>-1</sup> ) | Relative Intensity |
|------|--------------------------------|--------------------|
| 001  | 2786.8                         | 0.025              |
| 002  | 1552.0                         | 0.506              |
| 003  | 1290.9                         | 0.048              |
| 004  | 1113.8                         | 1.000              |
| 005  | 1014.2                         | 0.000              |
| 006  | 652.2                          | 0.000              |
| 007  | 567.4                          | 0.009              |
| 008  | 357.9                          | 0.045              |
| 009  | 303.0                          | 0.000              |
| 010  | 276.8                          | 0.030              |
| 011  | 248.4                          | 0.012              |
| 012  | 191.0                          | 0.002              |

**Table S7** Calculated vibrational modes of adsorbed formate at Fe<sub>3</sub>O<sub>4</sub> tet1-(111) surface with a quasi-bidentate binding mode via the rest group hydrogen with their wavenumber in cm<sup>-1</sup> and the relative intensity scaled to the highest peak in this spectrum. Plotted in Fig. S13.

## S2 Fano fitting

**Table S8** Fit parameter overview for selected Fano lines.

| Fit parameter                 | magnetite (111)<br>$\nu_s(\text{OCO})$ chel. | magnetite (111)<br>$\nu_s(\text{OCO})$ qbt. | magnetite (001)<br>$\nu_s(\text{OCO})$ bb. | magnetite (001)<br>$\delta(\text{CH})$ |
|-------------------------------|----------------------------------------------|---------------------------------------------|--------------------------------------------|----------------------------------------|
| $\theta$ ( $^\circ$ )         | 74.4                                         | 75.2                                        | 75.5                                       | 75.5                                   |
| $\nu_0$ ( $\text{cm}^{-1}$ )  | 1380.57                                      | 1336.87                                     | 1372.00                                    | 1372.67                                |
| $\gamma$ ( $\text{cm}^{-1}$ ) | 4.73                                         | 6.03                                        | 9.12                                       | 4.28                                   |
| $N_s$                         | 0.008                                        | 0.008                                       | 0.026                                      | 0.020                                  |
| $\alpha_v$                    | 0.65                                         | 1.46                                        | 1.22                                       | 0.42                                   |

  

| Fit parameter                 | magnetite (001)<br>$\nu_{\text{as}}^{\text{tet}}(\text{OCO})$ | magnetite (001)<br>$\nu_{\text{as}}^{\text{int}}(\text{OCO})$ |
|-------------------------------|---------------------------------------------------------------|---------------------------------------------------------------|
| $\theta$ ( $^\circ$ )         | 77.0                                                          | 77.0                                                          |
| $\nu_0$ ( $\text{cm}^{-1}$ )  | 1552.10                                                       | 1541.47                                                       |
| $\gamma$ ( $\text{cm}^{-1}$ ) | 8.91                                                          | 9.97                                                          |
| $N_s$                         | 0.002                                                         | 0.007                                                         |
| $\alpha_v$                    | 1.3                                                           | 1.05                                                          |

## References

- [1] J. P. Perdew, K. Burke, and M. Ernzerhof, *Phys. Rev. Lett.*, 1996, **77**(18), 3865–3868.
- [2] B. Grabowski, T. Hickel, and J. Neugebauer, *Phys. Rev. B*, 2007, **76**(2), 024309.
- [3] C. Stampfl and C. G. Van de Walle, *Phys. Rev. B*, 1999, **59**(8), 5521–5535.
- [4] J. Sun, A. Ruzsinszky, and J. P. Perdew, *Phys. Rev. Lett.*, 2015, **115**, 036402.
- [5] A. Contreras-Payares, P. G. Lustemberg, and M. V. Ganduglia-Pirovano, *J. Chem. Phys.*, 2025, **163**(2), 024701.
- [6] A. V. Krukau, O. A. Vydrov, A. F. Izmaylov, and G. E. Scuseria, *J. Chem. Phys.*, 2006, **125**(22), 224106.
- [7] P. G. Lustemberg, C. Yang, Y. Wang, C. Wöll, and M. V. Ganduglia-Pirovano, *J. Chem. Phys.*, 2023, **159**(3), 034704.
- [8] I. M. Alecu, J. Zheng, Y. Zhao, and D. G. Truhlar, *J. Chem. Theory Comput.*, 2010, **6**(9), 2872–2887.
- [9] D. Porezag and M. R. Pederson, *Phys. Rev. B*, 1996, **54**(11), 7830–7836.
- [10] E. S. Skibinski, W. J. I. DeBenedetti, and M. A. Hines, *J. Phys. Chem. C*, 2017, **121**(26), 14213–14221.
- [11] X. Li, J. Paier, J. Sauer, F. Mirabella, E. Zaki, F. Ivars-Barceló, S. Shaikhutdinov, and H.-J. Freund, June , 2017, **122**(2), 527–533.
- [12] J. P. Perdew, A. Ruzsinszky, G. I. Csonka, O. A. Vydrov, G. E. Scuseria, L. A. Constantin, X. Zhou, and K. Burke, *Phys. Rev. Lett.*, 2008, **100**, 136406.
- [13] J. P. Perdew and Y. Wang, *Physical Review B*, 1992, **45**(23), 13244.
- [14] J. Klimeš, D. R. Bowler, and A. Michaelides, *Journal of Physics: Condensed Matter*, 2010, **22**(2), 022201.
- [15] J. Klimeš, D. R. Bowler, and A. Michaelides, *Phys. Rev. B*, 2011, **83**(19), 195131.
- [16] B. Arndt, K. Sellschopp, M. Creutzburg, E. Grånäs, K. Krausert, V. Vonk, S. Müller, H. Noei, G. Vonbun-Feldbauer, and A. Stierle, *Comm. Chem.*, 2019, **2**(92).
- [17] M. Creutzburg, K. Sellschopp, S. Tober, E. Grånäs, V. Vonk, W. Mayr-Schmölzer, S. Müller, H. Noei, G. B. Vonbun-Feldbauer, and A. Stierle, *J. Phys. Chem. Lett.*, 2021, **12**(15), 3847–3852.
- [18] M. Rossi, *J. Chem. Phys.*, 2021, **154**(17), 170902.
- [19] K. Sellschopp *Understanding interfaces in metal-oxide/organic-acid hybrid materials from first-principles calculations*. PhD thesis, TU Hamburg, Germany, 2021.
- [20] G. Vonbun-Feldbauer and K. Sellschopp, Data for "Computational vibrational spectra for formic acid adsorbed on magnetite surfaces from DFT calculations". TUHH Open Research (TORE) Repository, DOI: 10.15480/882.15191, 2025.
